# Supplementary material
Source: PubMed Central journal article supplement (PMC4245374)
Supplement: NIHMS632187-supplement-Supp_Material.pdf [file NIHMS632187-supplement-Supp_Material.pdf]

## Supplementary Materials

### **Distinct Conformational Behaviors of Four Mammalian Dual-Flavin Reductases (Cytochrome P450 Reductase, Methionine Synthase Reductase, Neuronal Nitric Oxide Synthase, Endothelial Nitric Oxide Synthase) Determine their Unique Catalytic Profiles**

**Mohammad Mahfuzul Haque<sup>1</sup>, Mekki Bayachou<sup>2#</sup>, Jesus Tejero<sup>3#</sup>, Claire Kenney<sup>1</sup>, Naw May Pearl<sup>4</sup>, Sang-Choul Im<sup>4</sup>, Lucy Waskell<sup>4</sup>, and Dennis J. Stuehr<sup>1\*</sup>**

From the Departments of <sup>1</sup>Pathobiology, Lerner Research Institute, The Cleveland Clinic, Cleveland, Ohio 44195, <sup>2</sup>Chemistry, Cleveland State University, Cleveland, Ohio 44115, <sup>3</sup>Vascular Medicine Institute, University of Pittsburgh, Pittsburgh, PA 15261, USA, <sup>4</sup>Anesthesiology, University of Michigan Medical School and VA Medical Center, Ann Arbor, MI 48105, USA.

**# Both authors contributed equally to this work.**

\* Address correspondence to: Dennis J. Stuehr, Department of Pathobiology/NC22, Lerner Research Institute, The Cleveland Clinic, 9500 Euclid Ave., Cleveland, OH- 44195, USA. Phone: 216-445-6950, Email: [stuehrd@ccf.org](mailto:stuehrd@ccf.org).

**Table S1: Residue contacts in different dual-flavin enzymes.**

| <b>Cytochrome P450 reductase<br/>(1AMO)<br/>residue contacts</b> |                   |     |                   |     |
|------------------------------------------------------------------|-------------------|-----|-------------------|-----|
|                                                                  | <b>FMN domain</b> |     | <b>FNR domain</b> |     |
| 1.                                                               | LYS               | 72  | ASN               | 356 |
| 2.                                                               | LYS               | 75  | GLU               | 354 |
| 3.                                                               | ARG               | 78  | ASP               | 352 |
| 4.                                                               | GLN               | 87  | TYR               | 455 |
| 5.                                                               | GLN               | 87  | ARG               | 514 |
| 6.                                                               | THR               | 88  | GLN               | 452 |
| 7.                                                               | THR               | 90  | ARG               | 382 |
| 8.                                                               | PHE               | 94  | ARG               | 382 |
| 9.                                                               | ASN               | 96  | GLN               | 244 |
| 10.                                                              | ARG               | 97  | ARG               | 382 |
| 11.                                                              | ARG               | 97  | THR               | 383 |
| 12.                                                              | ARG               | 97  | ASN               | 384 |
| 13.                                                              | LYS               | 100 | ARG               | 243 |
| 14.                                                              | LYS               | 100 | GLN               | 244 |
| 15.                                                              | ARG               | 108 | ASP               | 352 |
| 16.                                                              | SER               | 111 | LYS               | 357 |
| 17.                                                              | GLU               | 116 | ASN               | 356 |
| 18.                                                              | ASP               | 147 | ARG               | 514 |
| 19.                                                              | THR               | 177 | ALA               | 633 |
| 20.                                                              | TYR               | 178 | TRP               | 677 |
| 21.                                                              | GLU               | 179 | GLN               | 641 |
| 22.                                                              | GLU               | 179 | LYS               | 664 |
| 23.                                                              | GLU               | 179 | MET               | 667 |
| 24.                                                              | GLU               | 213 | ARG               | 382 |
| 25.                                                              | GLU               | 213 | THR               | 383 |
| 26.                                                              | GLU               | 213 | TYR               | 416 |
| 27.                                                              | GLU               | 214 | SER               | 407 |
| 28.                                                              | GLU               | 214 | LYS               | 413 |
| 29.                                                              | GLU               | 214 | TYR               | 416 |
| 30.                                                              | ILE               | 217 | THR               | 383 |
| 31.                                                              | ILE               | 217 | ALA               | 406 |
| 32.                                                              | GLU               | 221 | SER               | 408 |

| <b>Neuronal Nitric Oxide Synthase<br/>(1TLL)</b> |                   |     |                   |      |
|--------------------------------------------------|-------------------|-----|-------------------|------|
| <b>Residue contacts</b>                          |                   |     |                   |      |
|                                                  | <b>FMN domain</b> |     | <b>FNR domain</b> |      |
| 1.                                               | GLU               | 762 | GLN               | 1171 |
| 2.                                               | GLU               | 762 | ARG               | 1229 |
| 3.                                               | THR               | 763 | GLN               | 1171 |
| 4.                                               | GLU               | 775 | ASP               | 961  |
| 5.                                               | GLU               | 775 | ARG               | 962  |
| 6.                                               | ASN               | 811 | GLU               | 1392 |
| 7.                                               | GLU               | 816 | ARG               | 1229 |
| 8.                                               | SER               | 840 | ASP               | 1386 |
| 9.                                               | LYS               | 842 | ARG               | 1385 |
| 10.                                              | VAL               | 843 | ASP               | 1386 |
| 11.                                              | ASN               | 846 | ARG               | 1385 |
| 12.                                              | VAL               | 848 | GLN               | 1363 |
| 13.                                              | VAL               | 848 | GLY               | 1378 |
| 14.                                              | ALA               | 888 | VAL               | 1352 |
| 15.                                              | ALA               | 888 | VAL               | 1397 |
| 16.                                              | ALA               | 888 | LEU               | 1408 |
| 17.                                              | TYR               | 889 | VAL               | 1352 |
| 18.                                              | TYR               | 889 | GLY               | 1396 |
| 19.                                              | TYR               | 889 | VAL               | 1397 |
| 20.                                              | PRO               | 890 | VAL               | 1352 |
| 21.                                              | GLU               | 919 | TRP               | 1140 |
| 22.                                              | LEU               | 920 | TRP               | 1140 |
| 23.                                              | LEU               | 920 | LEU               | 1408 |
| 24.                                              | LEU               | 920 | ARG               | 1409 |
| 25.                                              | CYS               | 921 | GLU               | 1136 |
| 26.                                              | CYS               | 921 | ILE               | 1413 |
| 27.                                              | GLY               | 922 | GLU               | 1136 |
| 28.                                              | GLU               | 924 | PRO               | 1106 |
| 29.                                              | GLU               | 925 | LYS               | 1130 |
| 30.                                              | GLU               | 925 | GLY               | 1131 |
| 31.                                              | ARG               | 928 | SER               | 1129 |
| 32.                                              | ARG               | 928 | LYS               | 1130 |

| <b>Endothelial Nitric Oxide Synthase</b> |               |     |                   |      |
|------------------------------------------|---------------|-----|-------------------|------|
| <b>(Model, 1TLL template)</b>            |               |     |                   |      |
| <b>Residue contacts</b>                  |               |     |                   |      |
|                                          | <b>FMN</b>    |     | <b>FNR domain</b> |      |
|                                          | <b>domain</b> |     |                   |      |
| 1.                                       | GLU           | 529 | GLN               | 938  |
| 2.                                       | GLU           | 529 | TYR               | 941  |
| 3.                                       | GLU           | 529 | ARG               | 996  |
| 4.                                       | THR           | 530 | GLN               | 938  |
| 5.                                       | ARG           | 542 | LYS               | 729  |
| 6.                                       | ARG           | 545 | LYS               | 836  |
| 7.                                       | ASN           | 578 | ARG               | 1152 |
| 8.                                       | ASN           | 578 | GLU               | 1159 |
| 9.                                       | ASN           | 578 | ILE               | 1161 |
| 10.                                      | GLU           | 583 | ARG               | 996  |
| 11.                                      | VAL           | 618 | GLY               | 1145 |
| 12.                                      | VAL           | 618 | ARG               | 1152 |
| 13.                                      | ARG           | 657 | ILE               | 1175 |
| 14.                                      | ARG           | 657 | SER               | 1179 |
| 15.                                      | ALA           | 658 | VAL               | 1119 |
| 16.                                      | TYR           | 659 | VAL               | 1119 |
| 17.                                      | TYR           | 659 | GLY               | 1163 |
| 18.                                      | PRO           | 660 | THR               | 1123 |
| 19.                                      | HIS           | 661 | ARG               | 1152 |
| 20.                                      | GLU           | 689 | TRP               | 907  |
| 21.                                      | LEU           | 690 | GLU               | 903  |
| 22.                                      | LEU           | 690 | TRP               | 907  |
| 23.                                      | LEU           | 690 | ILE               | 1175 |
| 24.                                      | LEU           | 690 | ARG               | 1176 |
| 25.                                      | CYS           | 691 | GLU               | 903  |
| 26.                                      | CYS           | 691 | PHE               | 1180 |
| 27.                                      | GLY           | 692 | ASP               | 898  |
| 28.                                      | GLY           | 692 | GLU               | 903  |
| 29.                                      | GLU           | 694 | PRO               | 873  |
| 30.                                      | GLU           | 694 | ASP               | 898  |
| 31.                                      | GLU           | 695 | GLN               | 897  |
| 32.                                      | GLU           | 695 | ASP               | 898  |
| 33.                                      | ARG           | 698 | PRO               | 873  |
| 34.                                      | ARG           | 698 | ARG               | 877  |
| 35.                                      | ARG           | 698 | SER               | 896  |
| 36.                                      | ARG           | 698 | GLN               | 897  |

| <b>Methionine synthase reductase</b> |                   |     |                   |     |
|--------------------------------------|-------------------|-----|-------------------|-----|
| <b>(Model, 1AMO template)</b>        |                   |     |                   |     |
| <b>Residue contacts</b>              |                   |     |                   |     |
|                                      | <b>FMN domain</b> |     | <b>FNR domain</b> |     |
| 1.                                   | ARG               | 2   | THR               | 349 |
| 2.                                   | ARG               | 2   | LYS               | 350 |
| 3.                                   | GLN               | 11  | ARG               | 525 |
| 4.                                   | GLN               | 12  | GLN               | 449 |
| 5.                                   | GLU               | 20  | LYS               | 352 |
| 6.                                   | GLU               | 21  | LYS               | 381 |
| 7.                                   | ASP               | 34  | LYS               | 350 |
| 8.                                   | ASP               | 34  | LYS               | 351 |
| 9.                                   | ASP               | 34  | LYS               | 352 |
| 10.                                  | LEU               | 35  | LYS               | 352 |
| 11.                                  | LEU               | 35  | GLY               | 353 |
| 12.                                  | HIS               | 36  | GLY               | 353 |
| 13.                                  | CYS               | 37  | GLY               | 353 |
| 14.                                  | GLU               | 40  | GLY               | 353 |
| 15.                                  | GLU               | 40  | ALA               | 354 |
| 16.                                  | ASP               | 67  | ARG               | 525 |
| 17.                                  | GLU               | 100 | ALA               | 653 |
| 18.                                  | GLU               | 100 | LYS               | 654 |
| 19.                                  | GLU               | 100 | SER               | 698 |
| 20.                                  | TYR               | 101 | ILE               | 696 |
| 21.                                  | TYR               | 101 | TRP               | 697 |
| 22.                                  | VAL               | 133 | ARG               | 418 |
| 23.                                  | GLU               | 136 | LYS               | 381 |
| 24.                                  | GLU               | 136 | LYS               | 382 |
| 25.                                  | GLU               | 136 | TYR               | 413 |
| 26.                                  | LEU               | 137 | LYS               | 382 |
| 27.                                  | GLU               | 140 | CYS               | 405 |

| <b>Methionine synthase reductase</b> |                   |     |                   |     |
|--------------------------------------|-------------------|-----|-------------------|-----|
| <b>(Model, 1TLL template)</b>        |                   |     |                   |     |
| <b>Residue contacts</b>              |                   |     |                   |     |
|                                      | <b>FMN domain</b> |     | <b>FNR domain</b> |     |
| 1.                                   | TYR               | 8   | LEU               | 245 |
| 2.                                   | GLN               | 11  | PRO               | 346 |
| 3.                                   | GLN               | 12  | PRO               | 246 |
| 4.                                   | GLN               | 12  | GLN               | 449 |
| 5.                                   | LYS               | 16  | LEU               | 245 |
| 6.                                   | ASP               | 34  | ASN               | 210 |
| 7.                                   | GLY               | 61  | ILE               | 696 |
| 8.                                   | THR               | 62  | GLN               | 694 |
| 9.                                   | ASP               | 67  | ARG               | 525 |
| 10.                                  | GLN               | 79  | GLU               | 688 |
| 11.                                  | THR               | 80  | GLU               | 688 |
| 12.                                  | VAL               | 83  | GLU               | 688 |
| 13.                                  | GLU               | 100 | LYS               | 654 |
| 14.                                  | TYR               | 101 | ALA               | 653 |
| 15.                                  | THR               | 102 | LYS               | 658 |
| 16.                                  | GLU               | 136 | LYS               | 382 |
| 17.                                  | LEU               | 137 | GLN               | 408 |
